# Supplementary material for: Characterization of Two NMN Deamidase Mutants as Possible Probes for an NMN Biosensor
Source: MDPI journal article supplement (doi:10.3390/ijms22126334), 2021-06-13
Supplement: s1 [file s1]

# Characterization of two NMN deamidase mutants as possible probes for an NMN biosensor

Alessandra Camarca<sup>1</sup>, Gabriele Minazzato<sup>2</sup>, Angela Pennacchio<sup>1</sup>, Alessandro Capo<sup>1</sup>, Adolfo Amici<sup>3</sup>, Sabato D'Auria<sup>1,4\*</sup> and Nadia Raffaelli<sup>2\*</sup>

<sup>1</sup> Institute of Food Sciences, National Research Council, Via Roma 64, 83100 Avellino, Italy

<sup>2</sup> Department of Agricultural, Food and Environmental Sciences, Polytechnic University of Marche, Via Brecce Bianche, 60131 Ancona, Italy

<sup>3</sup> Department of Clinical Sciences DISCO, Section of Biochemistry, Polytechnic University of Marche, Via Brecce Bianche, 60131 Ancona, Italy

<sup>4</sup> Department of Biology, Agriculture and Food Science, CNR, Piazzale Aldo Moro, 7, 00125 Rome, Italy

\* Correspondence to: N. Raffaelli, Department of Agricultural, Food and Environmental Sciences, Via Brecce Bianche, 60131 Ancona, Italy, Fax: +39 71 2204 677, Tel: +39 71 2204 682, E-mail: [n.raffaelli@staff.univpm.it](mailto:n.raffaelli@staff.univpm.it);

S. D'Auria, Department of Biology, Agriculture and Food Science, CNR, Piazzale Aldo Moro, 7, 00125 Rome, Italy, Tel. +39-3683422770, [sabato.dauria@cnr.it](mailto:sabato.dauria@cnr.it)

**Supplementary Table 1.** S29A PncC fluorescence quenching (%) *vs* buffer

|             | Nucleotides concentration [ $\mu$ M] |       |      |       |       |       |       |       |       |       |
|-------------|--------------------------------------|-------|------|-------|-------|-------|-------|-------|-------|-------|
|             | 0.185                                | 0.375 | 0.75 | 1.5   | 3     | 6     | 12    | 24    | 48    | 96    |
| <b>NMN</b>  | 0.48                                 | 0.58  | 2.58 | 10.1  | 17.42 | 17.55 | 27.06 | 37.52 | 46.79 | 52.82 |
| <b>NaNM</b> | 1.79                                 | 2.56  | 6.47 | 20.83 | 30.74 | 30.87 | 40.52 | 47.93 | 52.28 | 55.20 |
| <b>Na</b>   | 0                                    | 0     | 0    | 0     | 0     | 0     | 0     | 0.16  | 0.62  | 0.24  |
| <b>Nam</b>  | 0.08                                 | 0.18  | 0.48 | 1.49  | 2.51  | 2.65  | 3.29  | 3.29  | 3.71  | 5.01  |
| <b>NR</b>   | 0                                    | 0.12  | 0.80 | 0.96  | 1.84  | 1.98  | 2.29  | 3.13  | 3.51  | 4.48  |
| <b>NAD</b>  | 0.52                                 | 0.32  | 0.80 | 0     | 0.19  | 0.32  | 1.35  | 2.54  | 4.58  | 7.97  |
| <b>NADP</b> | 0                                    | 0     | 0.67 | 1.60  | 2.74  | 2.87  | 3.89  | 4.31  | 6.36  | 9.50  |
| <b>NaAD</b> | 0                                    | 0     | 0    | 0     | 0     | 0     | 0     | 0     | 1.97  | 6.69  |

**Supplementary Table 2.** K61Q PncC fluorescence quenching (%) *vs* buffer

|             | Nucleotides concentration [ $\mu$ M] |       |      |      |      |      |       |       |       |       |
|-------------|--------------------------------------|-------|------|------|------|------|-------|-------|-------|-------|
|             | 0.185                                | 0.375 | 0.75 | 1.5  | 3    | 6    | 12    | 24    | 48    | 96    |
| <b>NMN</b>  | 1.09                                 | 1.84  | 3.19 | 4.87 | 6.26 | 8.11 | 12.12 | 20.07 | 38.03 | 53.35 |
| <b>NaNM</b> | 0.71                                 | 1.11  | 2.05 | 2.12 | 2.82 | 2.80 | 4.14  | 4.9   | 7.14  | 10.68 |
| <b>Na</b>   | 0.49                                 | 1.2   | 2.11 | 2.66 | 2.89 | 2.81 | 3.26  | 2.74  | 3.69  | 4.46  |
| <b>Nam</b>  | 0                                    | 0.34  | 0.87 | 0.68 | 0.91 | 0.26 | 1.15  | 1.04  | 1.14  | 1.57  |
| <b>NR</b>   | 2.13                                 | 2.97  | 3.37 | 3.71 | 3.13 | 2.36 | 2.7   | 2.1   | 1.79  | 1.49  |
| <b>NAD</b>  | 0.63                                 | 1.39  | 1.57 | 0.80 | 0.85 | 0    | 0.65  | 0.36  | 0.72  | 1.58  |
| <b>NADP</b> | 0                                    | 0.06  | 0.29 | 0.55 | 0.42 | 0    | 1.20  | 1.59  | 2.90  | 5.10  |
| <b>NaAD</b> | 0.65                                 | 1.02  | 1.68 | 2.19 | 2.25 | 2.39 | 3.72  | 4.13  | 5.77  | 8.28  |

**Supplementary table 1 and table 2:** S29A PncC and K61Q PncC fluorescence quenching (%) at increasing concentration of nucleotides. The percentages of reduction of fluorescence intensities compared to buffer, were calculated as follow: (normalized fluorescence in presence of analyte at a given [ $\mu$ M])/normalized fluorescence in presence of corresponding volume of buffer) \*100.

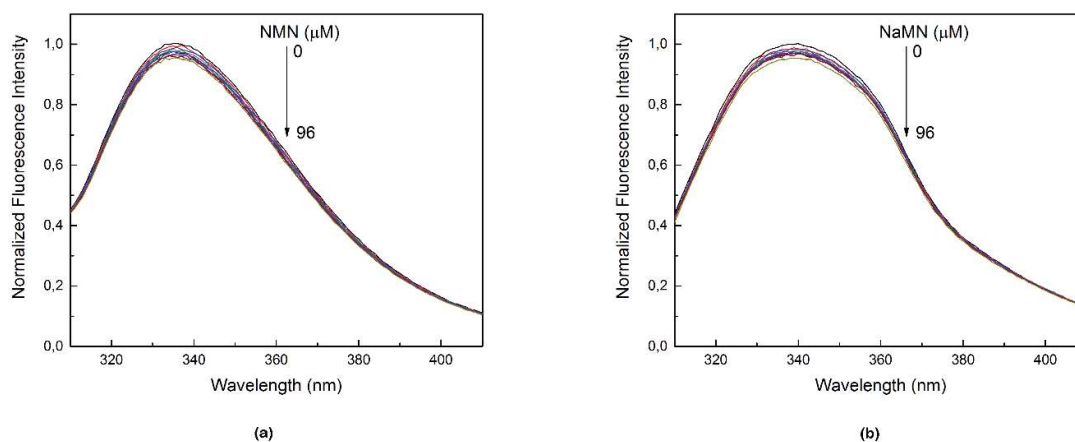

| GlnBP fluorescence reduction (%) vs buffer |                               |       |       |       |       |       |       |       |       |
|--------------------------------------------|-------------------------------|-------|-------|-------|-------|-------|-------|-------|-------|
|                                            | Nucleotide concentration [μM] |       |       |       |       |       |       |       |       |
|                                            | 0,375                         | 0,75  | 1,5   | 3     | 6     | 12    | 24    | 48    | 96    |
| NMN                                        | 1,21                          | 1,34  | 0,689 | 0,882 | 2,354 | 2,657 | 4,212 | 3,842 | 4,362 |
| NaNM                                       | 1,463                         | 0,699 | 0,375 | 0,567 | 2,273 | 1,958 | 3,227 | 3,267 | 4,358 |

(c)

**Figure S1:** Effects of NMN and NaMN on steady-state fluorescence emission of GlnBP. GlnBP (3 μM) was incubated with increasing concentration of NMN, NaMN or buffer (not shown), as described for the PncC proteins. **(a)** and **(b)** steady-state fluorescence emission representative spectra **(c)** Percentages of reduction of fluorescence intensities compared to buffer, were calculated as follow: (normalized fluorescence in presence of analyte at a given [μM])/normalized fluorescence in presence of corresponding volume of buffer) \*100.
